# Supplementary material for: Different Vegetation Information Inputs Significantly Affect the Evapotranspiration Simulations of the PT-JPL Model
Source: MDPI journal article supplement (doi:10.3390/rs14112573), 2022-05-27
Supplement: s1 [file s1]

**Supplemental materials to "Different vegetation information inputs significantly affect the evapotranspiration simulations of the PT-JPL model"**

**Table S1.** The performance of the PT-JPL model under two soil moisture constraints ( $f_{SM\_daily}$  versus  $f_{SM\_midday}$ ). Here  $f_{SM\_daily}$  represents that the constraint is calculated using daily average  $RH$  and  $VPD$ ;  $f_{SM\_midday}$  represents that the constraint is calculated using midday  $RH$  ( $RH_{min}$ ) and  $VPD$  ( $VPD_{max}$ ); the values in bold represent better performance statistics of the two methods.

| Station | $R^2$         |        | KGE           |        | Bias (%)      |        |
|---------|---------------|--------|---------------|--------|---------------|--------|
|         | daily average | midday | daily average | midday | daily average | midday |
| CBS     | 0.90          | 0.86   | 0.88          | 0.90   | 7.37          | -7.19  |
| QYZ     | 0.73          | 0.46   | <b>0.70</b>   | 0.49   | -6.26         | -21.29 |
| DHS     | 0.47          | 0.31   | <b>0.65</b>   | 0.43   | 16.28         | -7.85  |
| NMG     | 0.43          | 0.22   | <b>0.55</b>   | 0.08   | -23.98        | -62.83 |
| DL      | 0.67          | 0.67   | <b>0.76</b>   | 0.65   | 15.26         | -19.86 |
| DX      | 0.63          | 0.61   | <b>0.52</b>   | 0.33   | 6.15          | -39.46 |
| CL      | 0.72          | 0.69   | <b>0.78</b>   | 0.56   | -15.43        | -35.04 |
| HB      | 0.84          | 0.71   | <b>0.45</b>   | 0.26   | -34.42        | -53.37 |
| YC      | 0.66          | 0.58   | <b>0.63</b>   | 0.53   | -20.68        | -32.63 |
| LC      | 0.70          | 0.73   | <b>0.52</b>   | 0.50   | -28.66        | -34.59 |
| Basin   | 0.72          | 0.61   | <b>0.81</b>   | 0.75   | 5.80          | -9.23  |

**Table S2.** Comparison of the model performance obtained from two  $T_{\text{opt}}$  schemes:  $T_{\text{opt}} = 25^{\circ}\text{C}$  versus the empirical formula used in the original PT-JPL model. The values in bold represent better performance statistics of the two methods.

| Sites | $R^2$ |                   | KGE         |                   | Bias (%) |                   |
|-------|-------|-------------------|-------------|-------------------|----------|-------------------|
|       | 25°C  | Empirical formula | 25°C        | Empirical formula | 25°C     | Empirical formula |
| CBS   | 0.90  | 0.85              | 0.88        | 0.91              | 7.37     | 3.50              |
| QYZ   | 0.73  | 0.40              | <b>0.70</b> | 0.51              | -6.26    | -14.84            |
| DHS   | 0.47  | 0.26              | <b>0.65</b> | 0.44              | 16.28    | -0.91             |
| NMG   | 0.43  | 0.35              | <b>0.55</b> | 0.40              | -23.98   | -36.91            |
| DL    | 0.67  | 0.66              | <b>0.76</b> | 0.75              | 15.26    | 16.80             |
| DX    | 0.63  | 0.66              | <b>0.52</b> | 0.50              | 6.15     | 14.40             |
| CL    | 0.72  | 0.73              | <b>0.78</b> | 0.73              | -15.43   | -19.34            |
| HB    | 0.84  | 0.81              | <b>0.45</b> | 0.44              | -34.42   | -35.17            |
| YC    | 0.66  | 0.56              | <b>0.63</b> | 0.60              | -20.68   | -22.70            |
| LC    | 0.70  | 0.71              | <b>0.52</b> | 0.50              | -28.66   | -31.20            |
| Basin | 0.72  | 0.60              | <b>0.81</b> | 0.73              | 5.80     | 5.40              |

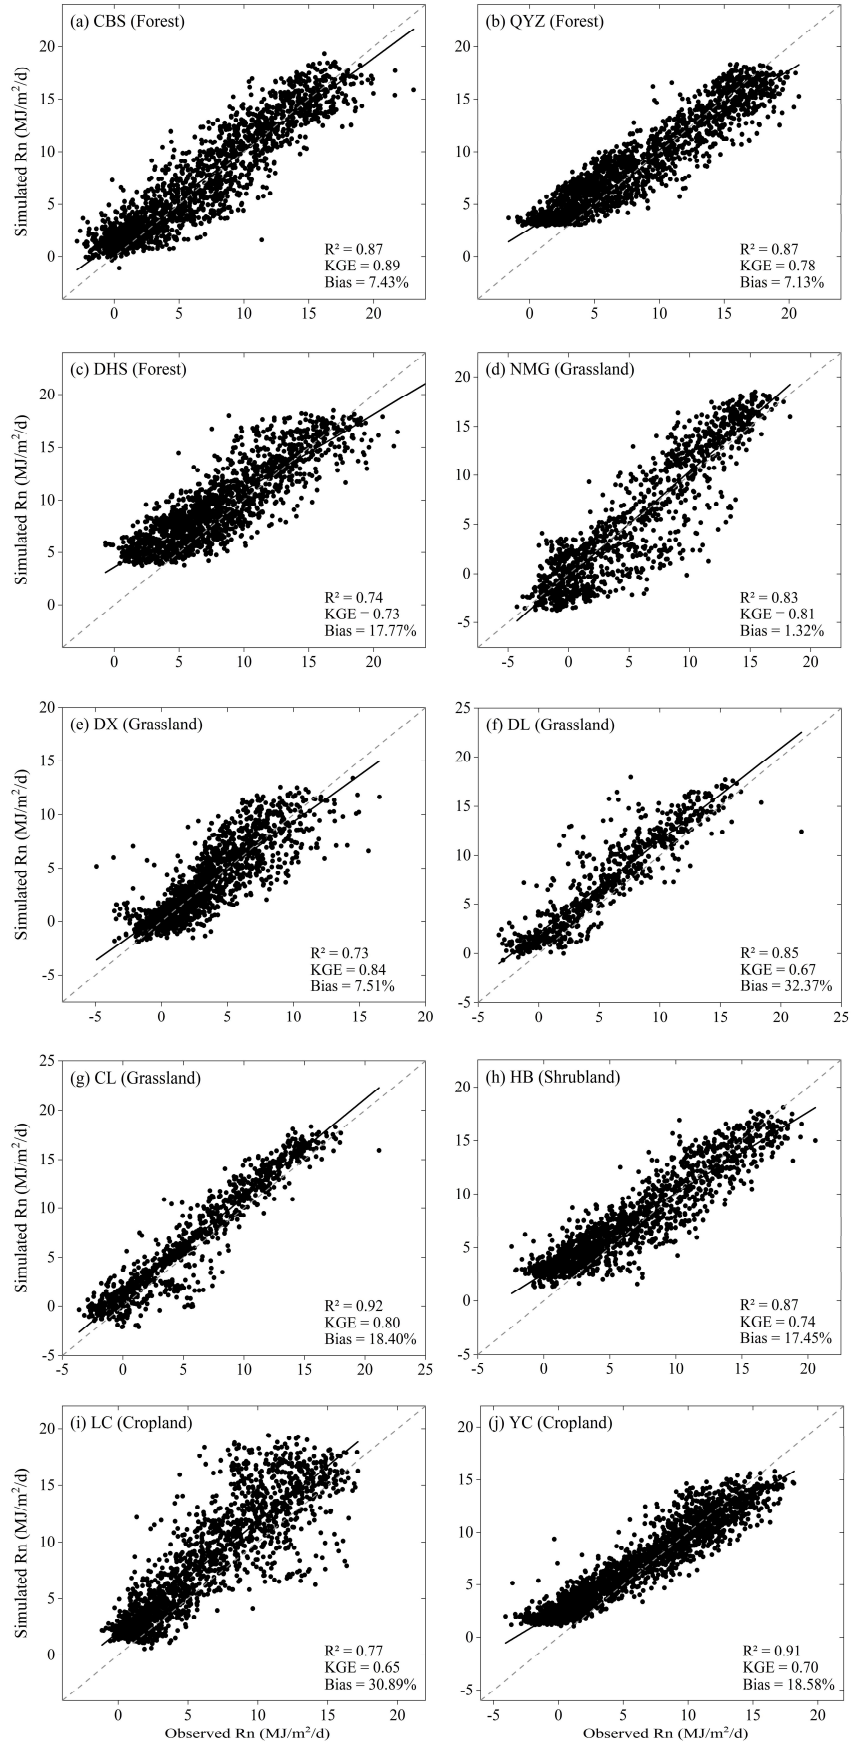

**Figure S1.** Scatterplots of net radiation ( $R_n$ ) estimates and observations at flux sites.

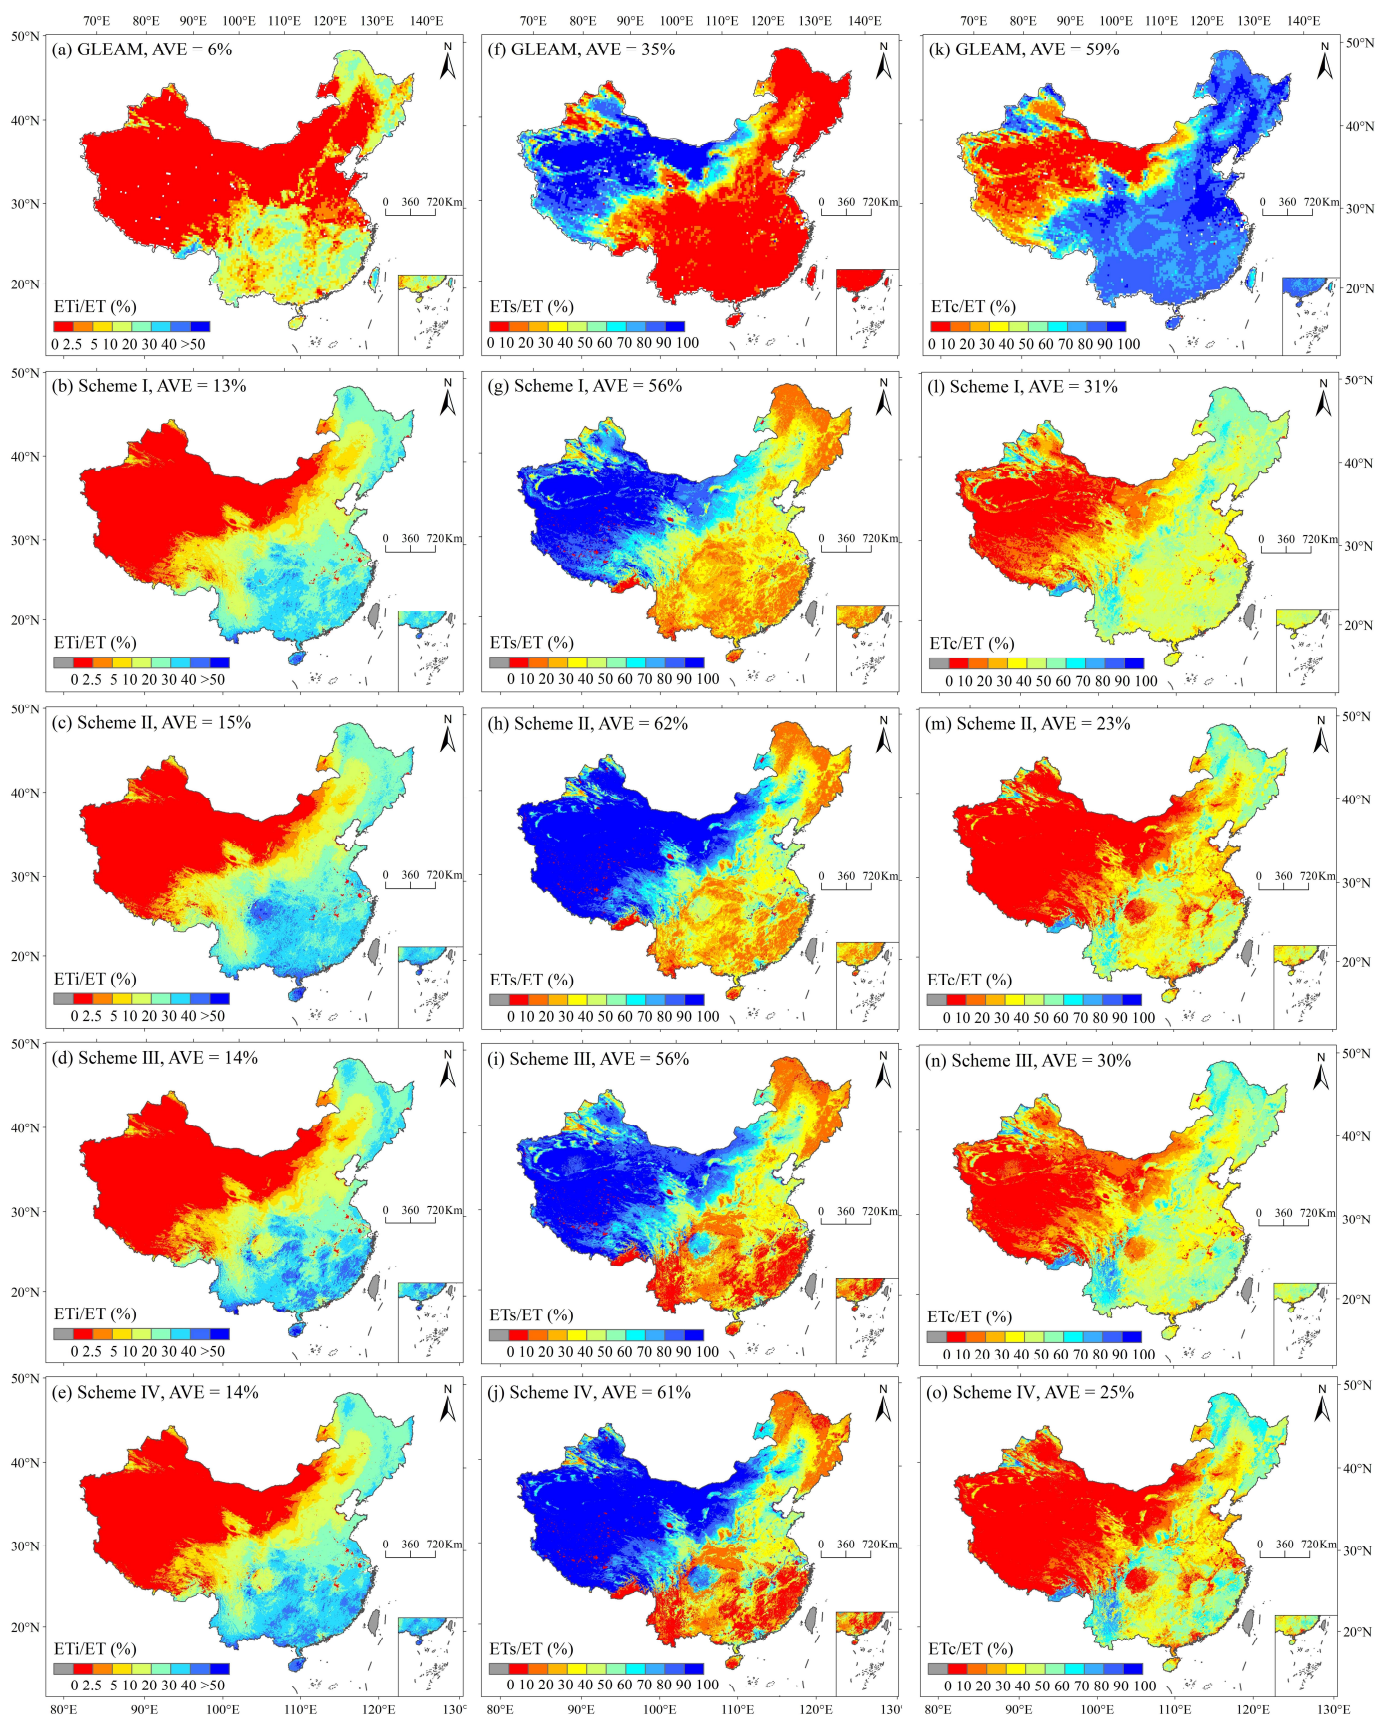

**Figure S2.** Spatial distribution map of the contribution of each component to total ET for GLEAM product and PT-JPL model.



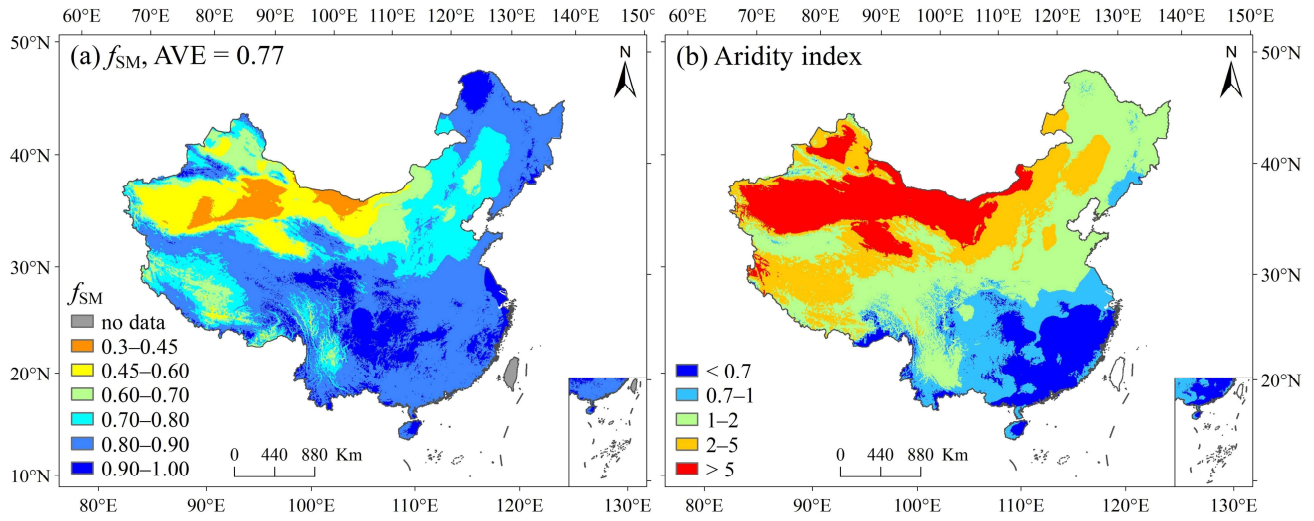

**Figure S3.** The spatial pattern of mean annual (1982-2015) soil moisture constraint ( $f_{SM}$ ) (a) and the aridity index (b) across China. Here the  $f_{SM}$  was calculated from daily average relative humidity ( $RH$ ) and vapor pressure deficit ( $VPD$ ).
